# Supplementary material
Source: publisher figshare collection journal article supplement (https://future-science-group.figshare.com/ndownloader/files/30717041)
Supplement: Supplementary file 1 [file 30717041]

**Supplementary Table 1:** List of abbreviations of all 92 biomarkers

| **Abbreviation** | **Full name** |
| --- | --- |
| **AP-N** | Aminopeptidase N |
| **AZU** | Azurocidin |
| **BLM hydrolase** | Bleomycin hydrolase |
| **CCL15** | C-C motif chemokine 15 |
| **CCL16** | C-C motif chemokine 16 |
| **CCL24** | C-C motif chemokine 24 |
| **CXCL16** | C-X-C motif chemokine 16 |
| **CDH5** | Cadherin-5 |
| **CPA1** | Carboxypeptidase A1 |
| **CPB1** | Carboxypeptidase B |
| **CASP-3** | Caspase-3 |
| **CTSD** | Cathepsin D |
| **CTSZ** | Cathepsin Z |
| **ALCAM** | CD166 antigen |
| **CHI3L1** | Chitinase-3-like protein 1 |
| **CHIT1** | Chitotriosidase-1 |
| **COL1A1** | Collagen alpha-1(I) chain |
| **CD93** | Complement component C1q receptor |
| **CNTN1** | Contactin-1 |
| **CSTB** | Cystatin-B |
| **SELE** | E-selectin |
| **PI3** | Elafin |
| **EPHB4** | Ephrin type-B receptor 4 |
| **EGFR** | Epidermal growth factor receptor |
| **Ep-CAM** | Epithelial cell adhesion molecule |
| **FABP4** | Fatty acid-binding protein, adipocyte |
| **Gal-3** | Galectin-3 |
| **Gal-4** | Galectin-4 |
| **GRN** | Granulins |
| **GDF-15** | Growth/differentiation factor 15 |
| **IGFBP-1** | Insulin-like growth factor-binding protein 1 |
| **IGFBP-2** | Insulin-like growth factor-binding protein 2 |
| **IGFBP-7** | Insulin-like growth factor-binding protein 7 |
| **ITGB2** | Integrin beta-2 |
| **ICAM-2** | Intercellular adhesion molecule 2 |
| **IL-1RT1** | Interleukin-1 receptor type 1 |
| **IL-1RT2** | Interleukin-1 receptor type 2 |
| **IL-17RA** | Interleukin-17 receptor A |
| **IL-18BP** | Interleukin-18-binding protein |
| **IL2-RA** | Interleukin-2 receptor subunit alpha |
| **IL-6RA** | Interleukin-6 receptor subunit alpha |
| **JAM-A** | Junctional adhesion molecule A |
| **KLK6** | Kallikrein-6 |
| **LDL receptor** | Low-density lipoprotein receptor |
| **LTBR** | Lymphotoxin-beta receptor |
| **MEPE** | Matrix extracellular phosphoglycoprotein |
| **MMP-2** | Matrix metalloproteinase-2 |
| **MMP-3** | Matrix metalloproteinase-3 |
| **MMP-9** | Matrix metalloproteinase-9 |
| **TIMP4** | Metalloproteinase inhibitor 4 |
| **MCP-1** | Monocyte chemotactic protein 1 |
| **PRTN3** | Myeloblastin |
| **MPO** | Myeloperoxidase |
| **MB** | Myoglobin |
| **NT-proBNP** | N-terminal prohormone brain natriuretic peptide |
| **Notch 3** | Neurogenic locus notch homolog protein 3 |
| **OPN** | Osteopontin |
| **OPG** | Osteoprotegerin |
| **SELP** | P-selectin |
| **PON3** | Paraoxonase |
| **PGLYRP1** | Peptidoglycan recognition protein 1 |
| **PLC** | Perlecan |
| **PAI** | Plasminogen activator inhibitor 1 |
| **PECAM-1** | Platelet endothelial cell adhesion molecule |
| **GP6** | Platelet glycoprotein VI |
| **PDGF subunit A** | Platelet-derived growth factor subunit A |
| **PCSK9** | Proprotein convertase subtilisin/kexin type 9 |
| **DLK-1** | Protein delta homolog 1 |
| **PSP-D** | Pulmonary surfactant-associated protein D |
| **RETN** | Resistin |
| **RARRES2** | Retinoic acid receptor responder protein 2 |
| **CD163** | Scavenger receptor cysteine-rich type 1 protein M130 |
| **SCGB3A2** | Secretoglobin family 3A member 2 |
| **SPON1** | Spondin-1 |
| **ST2** | ST2 protein |
| **TR-AP** | Tartrate-resistant acid phosphatase type 5 |
| **TFPI** | Tissue factor pathway inhibitor |
| **t-PA** | Tissue-type plasminogen activator |
| **TR** | Transferrin receptor protein 1 |
| **TFF3** | Trefoil factor 3 |
| **TLT-2** | Trem-like transcript 2 protein |
| **TNFSF13B** | Tumor necrosis factor ligand superfamily member 13B |
| **TNF-R1** | Tumor necrosis factor receptor 1 |
| **TNF-R2** | Tumor necrosis factor receptor 2 |
| **TNFRSF10C** | Tumor necrosis factor receptor superfamily member 10C |
| **TNFRSF14** | Tumor necrosis factor receptor superfamily member 14 |
| **FAS** | Tumor necrosis factor receptor superfamily member 6 |
| **AXL** | Tyrosine-protein kinase receptor UFO |
| **SHPS-1** | Tyrosine-protein phosphatase non-receptor type substrate 1 |
| **U-PAR** | Urokinase plasminogen activator surface receptor |
| **uPA** | Urokinase-type plasminogen activator |
| **vWF** | von Willebrand factor |
